# Supplementary material for: Adsorption and diffusion of lithium polysulfides over blue phosphorene for Li–S batteries
Source: Royal Society of Chemistry journal article supplement (doi:10.1039/c8nr04868a), 2018-01-01
Supplement: c8nr04868a13.pdf [file c8nr04868a13.pdf]

## Supporting Information

### Adsorption and Diffusion of Lithium Polysulfides over Blue Phosphorene for Li-S batteries

Sankha Mukherjee,<sup>a</sup> Lance Kavalsky,<sup>a</sup> Kinnor Chattopadhyay<sup>a,b</sup> and Chandra Veer Singh<sup>a,b\*</sup>

a. Department of Materials Science and Engineering, University of Toronto, Toronto, Ontario M5S 3E4, Canada

b. Department of Mechanical and Industrial Engineering, University of Toronto, Toronto, Ontario M5S 3E4, Canada

\*corresponding author email: [chandraveer.singh@utoronto.ca](mailto:chandraveer.singh@utoronto.ca)

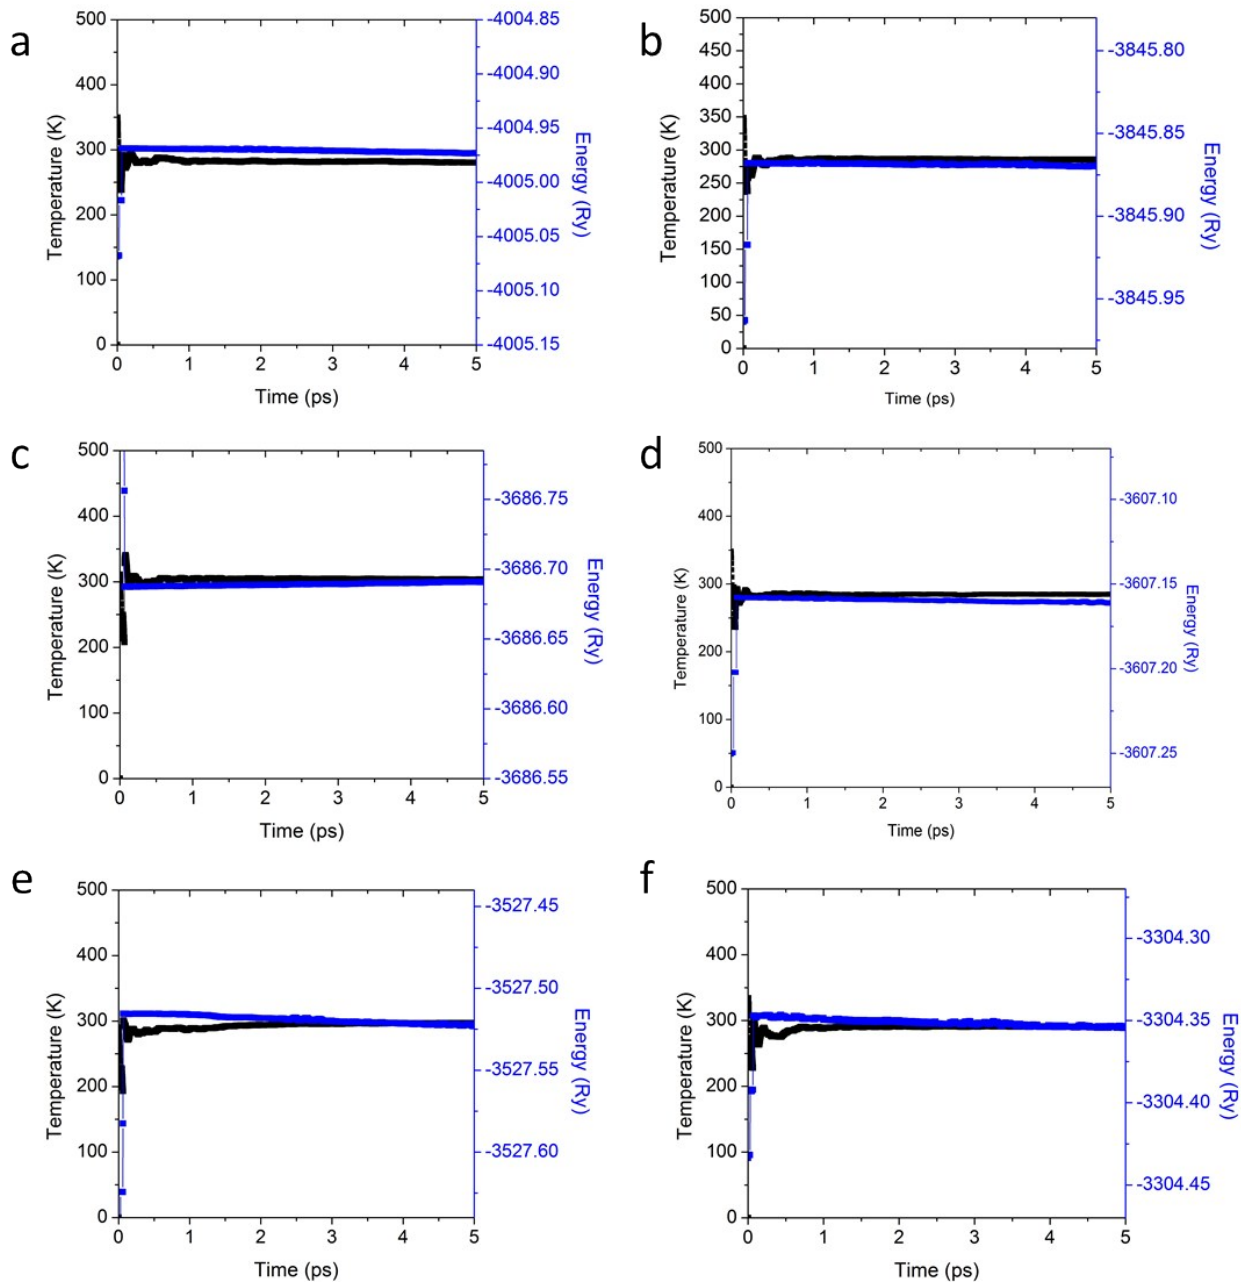

Figure S1: Time traces of temperature and total energy of a)  $\text{Li}_2\text{S}_8$  b)  $\text{Li}_2\text{S}_6$  c)  $\text{Li}_2\text{S}_4$  d)  $\text{Li}_2\text{S}_3$  e)  $\text{Li}_2\text{S}_2$  and f)  $\text{Li}_2\text{S}$  over pristine BP obtained from AIMD simulations.

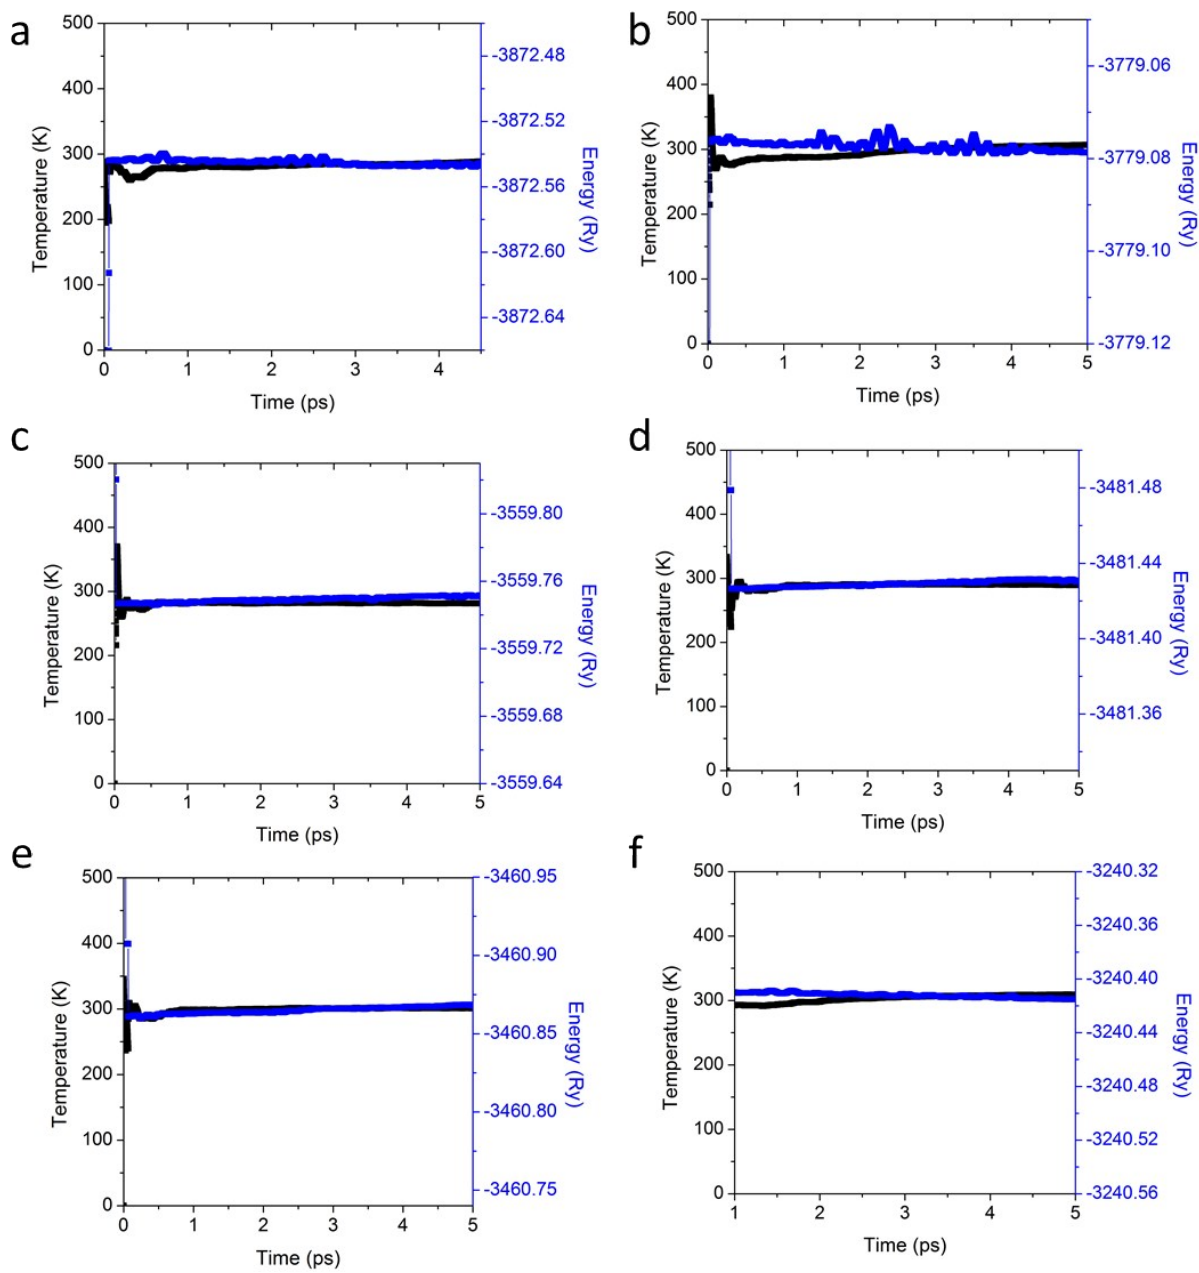

Figure S2: Time traces of temperature and total energy of a)  $\text{Li}_2\text{S}_8$  b)  $\text{Li}_2\text{S}_6$  c)  $\text{Li}_2\text{S}_4$  d)  $\text{Li}_2\text{S}_3$  e)  $\text{Li}_2\text{S}_2$  and f)  $\text{Li}_2\text{S}$  over SVBP obtained from AIMD simulations.

**Table S1:** Legend for movie files showing the evolution of LiPSs on BP hosts at 300 K.

| Movie # | Cathodic host     | Description                    |
|---------|-------------------|--------------------------------|
| 1       | Pristine BP       | Li <sub>2</sub> S              |
| 2       |                   | Li <sub>2</sub> S <sub>2</sub> |
| 3       |                   | Li <sub>2</sub> S <sub>3</sub> |
| 4       |                   | Li <sub>2</sub> S <sub>4</sub> |
| 5       |                   | Li <sub>2</sub> S <sub>6</sub> |
| 6       |                   | Li <sub>2</sub> S <sub>8</sub> |
| 7       | Single vacancy BP | Li <sub>2</sub> S              |
| 8       |                   | Li <sub>2</sub> S <sub>2</sub> |
| 9       |                   | Li <sub>2</sub> S <sub>3</sub> |
| 10      |                   | Li <sub>2</sub> S <sub>4</sub> |
| 11      |                   | Li <sub>2</sub> S <sub>6</sub> |
| 12      |                   | Li <sub>2</sub> S <sub>8</sub> |

**Table S2:** Comparison of energy barriers associated with the diffusion of Li, Na<sup>1</sup> and K<sup>1</sup> over pristine BP and their atomic radii.

| Alkali metal      | Diffusion barrier ( $\Delta E$ ) |        | Atomic radius (nm) |
|-------------------|----------------------------------|--------|--------------------|
|                   | Armchair                         | Zigzag |                    |
| Li                | 0.45                             | 0.12   | 167                |
| Na <sup>[1]</sup> | 0.24                             | 0.11   | 190                |
| K <sup>[1]</sup>  | 0.11                             | 0.093  | 243                |

### Reference

1. Mukherjee, S.; Kavalsky, L.; Singh, C. V., Ultrahigh Storage and Fast Diffusion of Na and K in Blue Phosphorene Anodes. *ACS applied materials & interfaces* **2018**.
